# Supplementary material for: Efficacy of Platelet-Rich Plasma in Retarding Intervertebral Disc Degeneration: A Meta-Analysis of Animal Studies
Source: Hindawi journal article supplement (doi:10.1155/2017/7919201), 2017-01-01

**Supplementary Table 1.** Quality assessment of the included studies (NA: Not available).

| Author          | Publication<br>in a<br>peer-reviewed<br>journal | Animal<br>temperature<br>control | Randomization<br>of treatment<br>or control<br>assignment | Allocation<br>concealment | Blinded<br>assessment<br>of outcome | Animal<br>anesthetics<br>without<br>marked<br>intrinsic<br>properties | Sample<br>size<br>calculation | Compliance<br>with<br>regulatory<br>requirements | Statement<br>of possible<br>conflict of<br>interest | Total<br>score |
|-----------------|-------------------------------------------------|----------------------------------|-----------------------------------------------------------|---------------------------|-------------------------------------|-----------------------------------------------------------------------|-------------------------------|--------------------------------------------------|-----------------------------------------------------|----------------|
| Nagae et al.    | 1                                               | NA                               | NA                                                        | NA                        | NA                                  | 1                                                                     | NA                            | 1                                                | NA                                                  | 3              |
| Sawamura et al. | 1                                               | NA                               | NA                                                        | NA                        | NA                                  | 1                                                                     | NA                            | 1                                                | NA                                                  | 3              |
| Chen et al.     | 1                                               | NA                               | NA                                                        | NA                        | NA                                  | 1                                                                     | NA                            | 1                                                | 1                                                   | 3              |
| Gullung et al.  | 1                                               | NA                               | 1                                                         | NA                        | 1                                   | 1                                                                     | NA                            | 1                                                | NA                                                  | 5              |
| Hu et al.       | 1                                               | NA                               | 1                                                         | NA                        | NA                                  | 1                                                                     | NA                            | 1                                                | NA                                                  | 5              |
| Obata et al.    | 1                                               | NA                               | NA                                                        | NA                        | NA                                  | 1                                                                     | NA                            | 1                                                | NA                                                  | 3              |
| Meng et al.     | 1                                               | NA                               | 1                                                         | NA                        | 1                                   | 1                                                                     | NA                            | 1                                                | NA                                                  | 5              |
| Gui et al.      | 1                                               | NA                               | 1                                                         | NA                        | NA                                  | 1                                                                     | NA                            | 1                                                | NA                                                  | 4              |
| Gui et al.      | 1                                               | NA                               | 1                                                         | NA                        | NA                                  | 1                                                                     | NA                            | 1                                                | NA                                                  | 4              |
| Wang et al.     | 1                                               | NA                               | 1                                                         | NA                        | NA                                  | 1                                                                     | NA                            | 1                                                | NA                                                  | 4              |
| Yang et al.     | 1                                               | NA                               | 1                                                         | NA                        | NA                                  | 1                                                                     | NA                            | 1                                                | NA                                                  | 4              |

Forest plots for the main analysis of disc height (A), T2 weighted MRI (B), histological degeneration grade (C) and collagen II expression (D.)

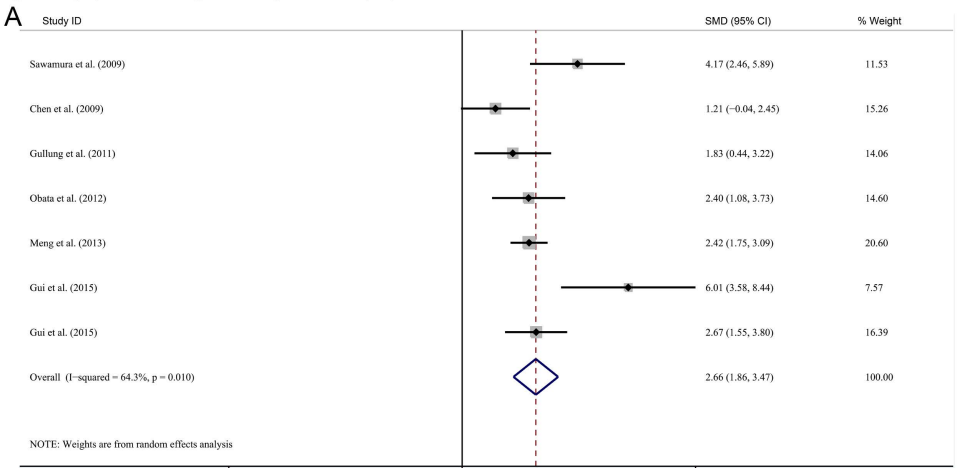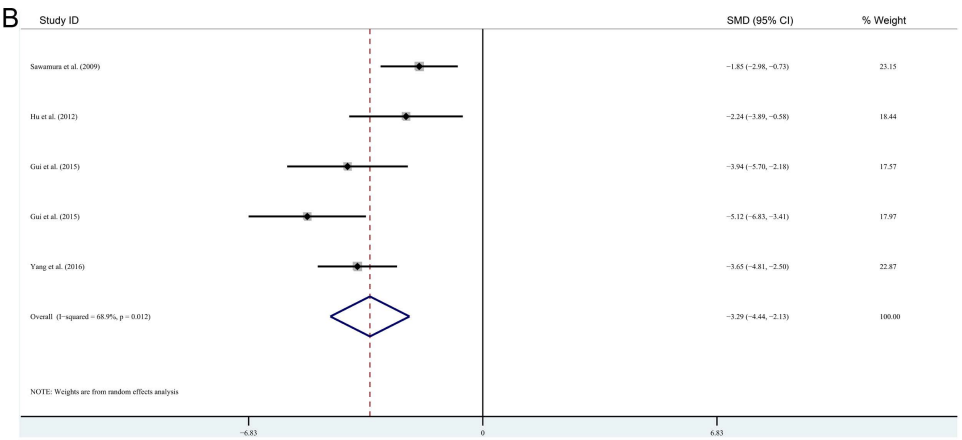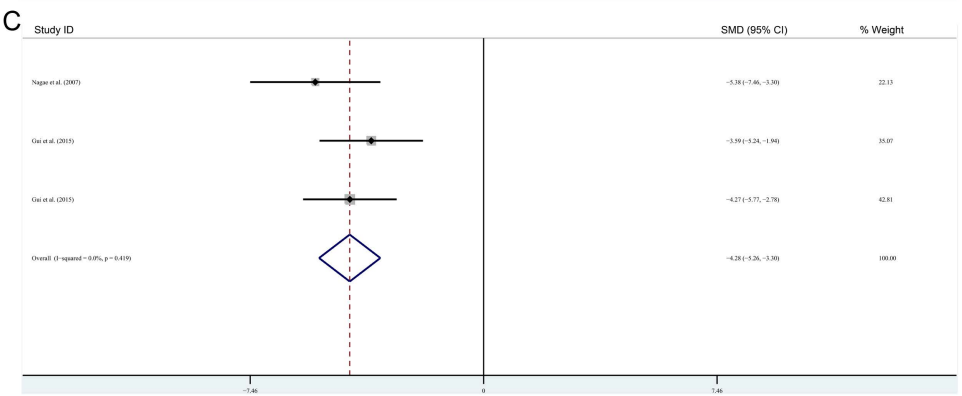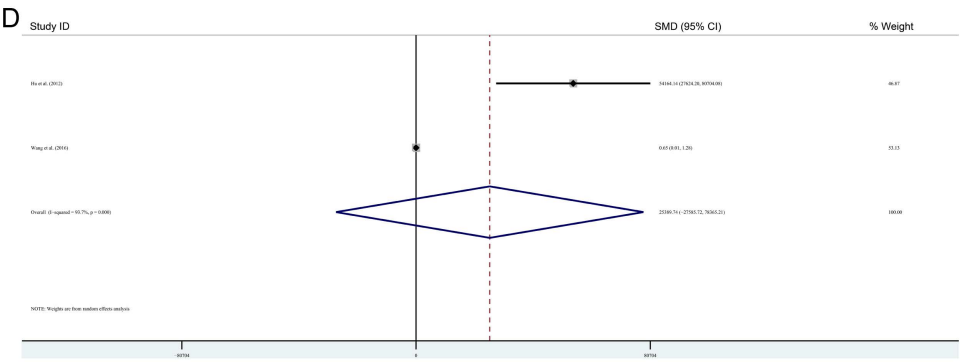

Supplement: f1 [file 7919201.f1.pdf]
